# Supplementary material for: Community Health Worker Program Characteristics and Population Health Outcomes: A Scoping Review
Source: Research Square preprint supplement (doi:10.21203/rs.3.rs-8327009/v1), 2026-01-12
Supplement: Supplementary file 1 [file 39aeddfc13dcf858fca6b82a.docx]

**LIST OF INCLUDED STUDIES**

1. Baynes, C., Mboya, D., Likasi, S., Maganga, D., Pemba, S., Baraka, J., Ramsey, K., & Semu, H. (2018). Quality of Sick Child-Care Delivered by Community Health Workers in Tanzania. *INTERNATIONAL JOURNAL OF HEALTH POLICY AND MANAGEMENT*, *7*(12), 1097–1109. https://doi.org/10.15171/ijhpm.2018.63
2. Charle-Cuéllar, P., Espí-Verdú, L., Goyanes, J., Bunkembo, M., Samake, S., Traore, M., Coulibaly, A. B., Landouré, A., Diawara, F., Dougnon, A. O., Vargas, A., & López-Ejeda, N. (2022). Scaling severe acute malnutrition treatment with community health workers: a geospatial coverage analysis in rural Mali. *HUMAN RESOURCES FOR HEALTH*, *20*(1). https://doi.org/10.1186/s12960-022-00771-8
3. Coker, T. R., Liljenquist, K., Lowry, S. J., Fiscella, K., Weaver, M. R., Ortiz, J., LaFontaine, R., Silva, J., Salaguinto, T., Johnson, G., Friesema, L., Porras-Javier, L., Guerra, L. J. S., & Szilagyi, P. G. (2023). Community Health Workers in Early Childhood Well-Child Care for Medicaid-Insured Children A Randomized Clinical Trial. *JAMA-JOURNAL OF THE AMERICAN MEDICAL ASSOCIATION*, *329*(20), 1757–1767. https://doi.org/10.1001/jama.2023.7197
4. Comfort, A. B., Chankova, S., Juras, R., Hsi, C. N., Peterson, L. A., & Hathi, P. (2016). Providing free pregnancy test kits to community health workers increases distribution of contraceptives: results from an impact evaluation in Madagascar. *CONTRACEPTION*, *93*(1), 44–51. https://doi.org/10.1016/j.contraception.2015.09.011 WE  - Science Citation Index Expanded (SCI-EXPANDED)
5. Duffy, S., Valley, T. M., Chavez, A., Aguilar, V., Villalobos, J. A., Tetreault, K., Chen, G. H., White, E., Bermudez-canete, A., Dang, D., Cornfield, J., Letona, Y., & Tun, R. (2025). Community Health Workers Equipped with an mHealth Application Can Accurately Diagnose Hypertension in Rural Guatemala. *GLOBAL HEART*, *20*(1). https://doi.org/10.5334/gh.1423 WE  - Science Citation Index Expanded (SCI-EXPANDED)
6. Ellis, D. A., Carcone, A. I., Kannikeswaran, N., Jacques-Tiura, A. J., & Holtrop, T. (2024). A randomized controlled trial of a family-based community health worker delivered intervention for urban adolescents with uncontrolled asthma. *CHILDRENS HEALTH CARE*. https://doi.org/10.1080/02739615.2024.2316083
7. Fisher, E. M., Idehen, A., Cárdenas, L., Lounsbury, D. W., Jasani, F., Rodgers, C. R. R., Gregoire, M., Williams, R., Weiss, L., & Strelnick, A. H. (2025). Participant Perspectives on a Community Health Worker Intervention to Reduce Infant Mortality: A Mixed Methods Assessment of the Bronx Healthy Start Partnership. *MATERNAL AND CHILD HEALTH JOURNAL*, *29*(1), 4–11. https://doi.org/10.1007/s10995-024-04014-1
8. Frisby, C., Eikelboom, R. H., Mahomed-Asmail, F., Kuper, H., de Kock, T., Manchaiah, V., & Swanepoel, D. (2022). Community-based adult hearing care provided by community healthcare workers using mHealth technologies. *GLOBAL HEALTH ACTION*, *15*(1). https://doi.org/10.1080/16549716.2022.2095784 WE  - Science Citation Index Expanded (SCI-EXPANDED) WE  - Social Science Citation Index (SSCI)
9. Garg, S., Dewangan, M., Krishnendu, C., & Patel, K. (2022). Coverage of home-based newborn care and screening by ASHA community health workers: Findings from a household survey in Chhattisgarh state of India. *JOURNAL OF FAMILY MEDICINE AND PRIMARY CARE*, *11*(10), 6356–6362. https://doi.org/10.4103/jfmpc.jfmpc_197_22 WE  - Emerging Sources Citation Index (ESCI)
10. Goudge, J., Babalola, O., Malatji, H., Levin, J., Thorogood, M., & Griffiths, F. (2023). The effect of a roving nurse mentor on household coverage and quality of care provided by community health worker teams in South Africa: a longitudinal study with a before, after and 6 months post design. *BMC HEALTH SERVICES RESEARCH*, *23*(1). https://doi.org/10.1186/s12913-023-09093-4
11. Hickey, M. D., Owaraganise, A., Ogachi, S., Sang, N. R., Wafula, E. M., Kabami, J., Sutter, N., Temple, J., Muiru, A., Chamie, G., Kakande, E., Petersen, M. L., Balzer, L. B., Havlir, D. V, Kamya, M. R., & Ayieko, J. (2025). Community health worker-facilitated telehealth for moderate-severe hypertension care in Kenya and Uganda: A randomized controlled trial. *PLOS MEDICINE*, *22*(6). https://doi.org/10.1371/journal.pmed.1004632 WE  - Science Citation Index Expanded (SCI-EXPANDED)
12. Hickey, M. D., Owaraganise, A., Ogachi, S., Sunday, H., Aoko, C., Sang, N., Agengo, G., Kabami, J., Kakande, E., Mugoma, E. W., Schwab, J., Sutter, N., Black, D., Muiru, A., Chamie, G., Petersen, M. L., Balzer, L. B., Bukusi, E. A., Havlir, D. V, … Ayieko, J. (2025). A prospective cohort study of the SEARCH integrated HIV/hypertension community health worker-led intervention in rural Kenya and Uganda. *JOURNAL OF THE INTERNATIONAL AIDS SOCIETY*, *28*. https://doi.org/10.1002/jia2.26500 WE  - Science Citation Index Expanded (SCI-EXPANDED)
13. Hofer, R., Choi, H. J., Mase, R., Fagerlin, A., Spencer, M., & Heisler, M. (2017). Mediators and Moderators of Improvements in Medication Adherence: Secondary Analysis of a Community Health Worker-Led Diabetes Medication Self-Management Support Program. *HEALTH EDUCATION & BEHAVIOR*, *44*(2), 285–296. https://doi.org/10.1177/1090198116656331 WE  - Social Science Citation Index (SSCI)
14. Horwood, C., Butler, L., Barker, P., Phakathi, S., Haskins, L., Grant, M., Mntambo, N., & Rollins, N. (2017). A continuous quality improvement intervention to improve the effectiveness of community health workers providing care to mothers and children: a cluster randomised controlled trial in South Africa. *HUMAN RESOURCES FOR HEALTH*, *15*. https://doi.org/10.1186/s12960-017-0210-7
15. Ilozumba, O., Van Belle, S., Dieleman, M., Liem, L., Choudhury, M., & Broerse, J. E. W. (2018). The effect of a community health Worker Utilized Mobile health application on Maternal health Knowledge and Behavior: a Quasi-experimental study. *FRONTIERS IN PUBLIC HEALTH*, *6*. https://doi.org/10.3389/fpubh.2018.00133
16. Justvig, S. P., Li, J., Caravella, G., Chen, M., Wang, H., Benz Scott, L. A., & Pati, S. (2017). Improving Adherence to Care Recommendations Using a Community Health Worker (CHW) Intervention with the Pediatric Medical Home. *Journal of Community Health*, *42*(3), 444–452. https://doi.org/10.1007/s10900-016-0275-6
17. Kangovi, S., Mitra, N., Norton, L., Harte, R., Zhao, X. Y., Carter, T., Grande, D., & Long, J. A. (2018). Effect of Community Health Worker Support on Clinical Outcomes of Low-Income Patients Across Primary Care Facilities A Randomized Clinical Trial. *JAMA INTERNAL MEDICINE*, *178*(12), 1635–1643. https://doi.org/10.1001/jamainternmed.2018.4630
18. Koniak-Griffin, D., Brecht, M.-L., Takayanagi, S., Villegas, J., Melendrez, M., & Balcázar, H. (2015). A community health worker-led lifestyle behavior intervention for Latina (Hispanic) women: Feasibility and outcomes of a randomized controlled trial. *International Journal of Nursing Studies*, *52*(1), 75–87. https://doi.org/10.1016/j.ijnurstu.2014.09.005
19. Lukyamuzi, Z., Nabisere, R. M., Nakalega, R., Atuhaire, P., Kataike, H., Ssuna, B., Baroudi, M., Kiweewa, F. M., Musoke, P., & Butler, L. M. (2022). Community Health Workers Improve HIV Disclosure Among HIV-Affected Sexual Partners in Rural Uganda: A Quasi-Experimental Study. *GLOBAL HEALTH-SCIENCE AND PRACTICE*, *10*(5). https://doi.org/10.9745/GHSP-D-21-00631 WE  - Science Citation Index Expanded (SCI-EXPANDED) WE  - Social Science Citation Index (SSCI)
20. Lukyamuzi, Z., Ssuna, B., Mirembe, R. N., Mawanda, D., Maena, J., Nakalega, R., Atuhaire, P., Musoke, P., & Butler, L. M. (2023). Incidence of HIV disclosure among HIV affected heterosexual partners using a community health worker led mechanism in rural Uganda; a quasi-experimental study. *BMC INFECTIOUS DISEASES*, *23*(1). https://doi.org/10.1186/s12879-023-08282-0 WE  - Science Citation Index Expanded (SCI-EXPANDED)
21. Masunaga, Y., Ribera, J. M., Jaiteh, F., de Vries, D. H., & Grietens, K. P. (2022). Village health workers as health diplomats: negotiating health and study participation in a malaria elimination trial in The Gambia. *BMC HEALTH SERVICES RESEARCH*, *22*(1). https://doi.org/10.1186/s12913-021-07431-y
22. McAtee, C. M., Baker, J. T., Dewolf, B. M., Sheridan, M. N., George, E. M., & Sutton, N. A. (2024). Evaluation of a Cardiovascular Disease/Diabetes Mellitus Expansion Program for Community Health Workers Employed by Rhode Island Community Health Teams. *JOURNAL OF PUBLIC HEALTH MANAGEMENT AND PRACTICE*, *30*, S18–S26. https://doi.org/10.1097/PHH.0000000000001896
23. Myers, B., Petersen-Williams, P., van der Westhuizen, C., Lund, C., Lombard, C., Joska, J. A., Levitt, N. S., Butler, C., Naledi, T., Milligan, P., Stein, D. J., & Sorsdahl, K. (2019). Community health worker-delivered counselling for common mental disorders among chronic disease patients in South Africa: a feasibility study. *BMJ OPEN*, *9*(1). https://doi.org/10.1136/bmjopen-2018-024277 WE  - Science Citation Index Expanded (SCI-EXPANDED) WE  - Social Science Citation Index (SSCI)
24. Naidoo, N., Zuma, N., Khosa, N. S., Marincowitz, G., Railton, J., Matlakala, N., Jobson, G. A., Igumbor, J. O., McIntyre, J. A., Struthers, H. E., & Peters, R. P. H. (2018). Qualitative assessment of facilitators and barriers to HIV programme implementation by community health workers in Mopani district, South Africa. *PLOS ONE*, *13*(8). https://doi.org/10.1371/journal.pone.0203081 WE  - Science Citation Index Expanded (SCI-EXPANDED) WE  - Social Science Citation Index (SSCI)
25. Omorou, A. Y., Ndishimye, P., Hoen, B., Mutesa, L., Karame, P., Nshimiyimana, L., Galmiche, S., Mugabo, H., Murayire, J., Mugisha, M., Umulisa, M. M., Uwera, Y. D. N., Uwera, N., Musanagabanwa, C., Bigirimana, N., Nsanzimana, S., Guillemin, F., & Rwabihama, J. P. (2024). Feasibility, Acceptability, Satisfaction, and Challenges of an mHealth App (e-ASCov) for Community-Based COVID-19 Screening by Community Health Workers in Rwanda: Mixed Methods Study. *JMIR MHEALTH AND UHEALTH*, *12*. https://doi.org/10.2196/50745 WE  - Science Citation Index Expanded (SCI-EXPANDED)
26. Regan, M., Cheng, C., Mboggo, E., Larson, E., Lema, I. A., Magesa, L., Machumi, L., Ulenga, N., Sando, D., Mwanyika-Sando, M., Barnhart, D. A., Hong, B. L., Mungure, E., Li, N., Siril, H., Mujinja, P., Naburi, H., Kilewo, C., Ekström, A. M., … Spiegelman, D. (2023). The impact of a community health worker intervention on uptake of antenatal care: a cluster-randomized pragmatic trial in Dar es Salaam. *HEALTH POLICY AND PLANNING*, *38*(3), 279–288. https://doi.org/10.1093/heapol/czac100
27. Rotheram-Borus, M. J., le Roux, K. W., Norwood, P., Katzen, L. S., Snyman, A., le Roux, I., Dippenaar, E., & Tomlinson, M. (2023). The effect of supervision on community health workers’ effectiveness with households in rural South Africa: A cluster randomized controlled trial. *PLOS MEDICINE*, *20*(3). https://doi.org/10.1371/journal.pmed.1004170
28. Shrestha, A. D., Gyawali, B., Shrestha, A., Shrestha, S., Neupane, D., Ghimire, S., Campbell, C., & Kallestrup, P. (2022). Effect of a female community health volunteer-delivered intervention to increase cervical cancer screening uptake in Nepal: a cluster randomized controlled trial. *PREVENTIVE MEDICINE REPORTS*, *29*. https://doi.org/10.1016/j.pmedr.2022.101948
29. Tomlinson, M., Rotheram-Borus, M. J., Harwood, J., le Roux, I. M., O’Connor, M., & Worthman, C. (2015). Community health workers can improve child growth of antenatally-depressed, South African mothers: a cluster randomized controlled trial. *BMC PSYCHIATRY*, *15*. https://doi.org/10.1186/s12888-015-0606-7 WE  - Science Citation Index Expanded (SCI-EXPANDED) WE  - Social Science Citation Index (SSCI)
30. Wightman, P., McCue, K., Sabo, S., Annorbah, R., Jiménez, D., Pilling, V., Butler, M., Celaya, M. F., & Rumann, S. (2022). Community health worker intervention improves early childhood vaccination rates: results from a propensity-score matching evaluation. *BMC PUBLIC HEALTH*, *22*(1). https://doi.org/10.1186/s12889-022-14239-w
31. Zakus, D., Moussa, M., Ezechiel, M., Yimbesalu, J. P., Orkar, P., Damecour, C., Ghee, A. E., MacFarlane, M., & Nganga, G. (2019). Clinical evaluation of the use of an mhealth intervention on quality of care provided by Community Health Workers in southwest Niger. *JOURNAL OF GLOBAL HEALTH*, *9*(1). https://doi.org/10.7189/jogh.09.010812
