# Supplementary material for: Community Health Worker Program Characteristics and Population Health Outcomes: A Scoping Review
Source: Research Square preprint supplement (doi:10.21203/rs.3.rs-8327009/v1), 2026-01-12
Supplement: Supplementary file 2 [file 62aff7f616a4af5372618474.docx]

**Characteristics of Included Studies on Community Health Worker Interventions and Health Outcomes**

| **No** | **Study (Author, Year, Country)** | **Study Design & Setting** | **Population & Sample** | **CHW Characteristics & Training** | **Supervision** | **Technology/Tools** | **Intervention** | **Outcomes & Key Findings** | **Implementation Factors** |
| --- | --- | --- | --- | --- | --- | --- | --- | --- | --- |
| 1 | (Ilozumba et al., 2018)  India | Quasi-experimental study with three groups conducted in rural, community-based settings in India from 2011-2016. | Pregnant women and mothers who delivered in the last 12 months (ages 18-45 years); n=2,200 (740 per group). Context: 34% HIV positive population, 52% literacy rate, 93% receive government grants. | ASHAs (Accredited Social Health Activists) with adapted education requirements due to low regional literacy. Training included 10-day government orientation, NGO training, and 2-week shadowing period. | Technology specialist at NGO managed cloud platform with alerts for visit scheduling. CHWs received government salary at minimum wage. | Nokia phones with open-source software featuring voice-based text processing, alert functions, GPS, cloud storage, and multimedia capabilities (text, voice, pictures). | Mobile for Mothers (MfM) app supporting home visits with multimedia delivery. Components included registration, checklists, danger sign monitoring, and educational prompts integrated with National Rural Health Mission (NHRM). | MfM intervention versus standard care showed significant improvements: maternal knowledge (aOR 1.19, 95% CI 1.13-1.25, p<0.05), ANC attendance ≥4 visits (aOR 1.38, 95% CI 1.32-1.44, p<0.05), and institutional delivery (OR 1.34, 95% CI 1.28-1.41, p<0.05). Caste remained a strong predictor across all outcomes. | Integration with NHRM infrastructure, ambulance services availability, and financial incentives for facility delivery. Program addressed low literacy context through voice-based technology. |
| 2 | (Hofer et al., 2017)  United States of America | Randomized controlled trial (secondary analysis) conducted in urban, home-based setting at a federally qualified health center. | Low-income adults with Type 2 diabetes (n=176, 94% completion rate). Demographics: 57% Latino, 50% African American, mean age 51.5 years, 31% unemployed, low health literacy. | Trusted individuals from the community (specific criteria and training not detailed in available data). | Not specified | Two intervention arms: (1) interactive e-health tool or (2) print materials for diabetes medication decision support. | Three-month home visit program for diabetes medication decision support delivered by trusted CHWs, comparing digital versus print educational materials. | Improvement in satisfaction with medication information significantly associated with medication adherence (coef .093, p=.019). Medication knowledge and decisional conflict were NOT associated with adherence. Relationship strongest for high baseline A1c >7 (coef .173, p=.003), women, non-insulin users, high self-efficacy, less than high school education, African American, and lower health literacy groups. | Low-income population context, home-based delivery model. Face-to-face relationship in home setting identified as key to satisfaction with medication information. |
| 3 | (Rotheram-Borus et al., 2023)  South Africa | Cluster RCT involving 8 clinics in rural, home-based settings in former Transkei homeland. Study duration: June 2017-February 2021. | Pregnant women age ≥14 years (mean age 24, 34% HIV positive); n=873 recruited, 802 with live births analyzed. Context: deeply rural area with 48% unsafe water, 52% illiteracy. | Government-employed, salaried CHWs (SC: 23 CHWs; AC: 20 CHWs). Training: 10 days plus 1 month practical training. | Standard Care (SC): weekly clinic reporting, no field supervision, no visit verification. Accountable Care (AC): Philani supervisors provided biweekly field drop-ins (4-6 households/day) with online monitoring of mobile logs and transport for emergencies. Compensation: R21.91/hour minimum wage. | AC arm: mobile phones with GPS for visit logging, backpacks with scales, thermometers, medications, condoms. SC arm: paper records (not maintained). | Two conditions compared: (1) Standard Care with minimal supervision versus (2) Accountable Care with enhanced supervision, biweekly field visits, mobile GPS logging, equipped backpacks, and emergency transport. | Implementation showed stark differences: SC 7-9% versus AC 62-77% of mothers reported CHW visits. Only 1 of 13 outcomes reached statistical significance (p<0.025): ARV adherence (SC mean 2.3 vs AC mean 2.9, p<0.025). Positive trends (p<0.10) for breastfeeding at 6 months (SC 39.7% vs AC 49.4%, p=.032) and underweight children (SC 6.93% vs AC 4.11%, p=.078). Overall failed to reject null hypothesis despite positive trends in 11/13 outcomes. | Average AC caseload: 61 mother-infant pairs (range 27-110). COVID-19 disruption March-October 2020 and staffing challenges due to hiring freeze significantly impacted implementation. |
| 4 | (Coker et al., 2023)  United States of America | Cluster RCT (10 FQHCs: 5 intervention, 5 usual care) in urban settings. Study period: March 2019-July 2022 during COVID-19 pandemic. | Parents with children <12 months presenting for well-child visits (n=937 enrolled, 785 completed 12-month follow-up). Demographics: 95% mothers, 73% Latino, 50% English primary language, 48% born outside US, 94% Medicaid-insured, mean child age 4.4 months at enrollment. | CHWs served as "coaches" (health educators); bilingual Spanish speakers with previous clinic experience. Training: 4-6 weeks including didactics, observed mock visits, and precepted visits with real-time feedback. Content covered core CHW competencies, community resources, trauma-informed care, motivational interviewing, social needs, child development, and Bright Futures guidelines. | Monthly fidelity checks conducted on 4 randomly selected charts per coach. Results: 94% of charts (384/407) documented all 3 required services (anticipatory guidance, social needs assessment, developmental/behavioral concerns discussion). Compensation not specified. | Electronic health record templates for coach documentation, previsit screening tools, telemedicine/phone capability (especially during COVID-19). | PARENT intervention: team-based approach with CHW integrated into well-child care team. Services included anticipatory guidance, psychosocial/social needs screening and referral, developmental/behavioral surveillance and guidance. Previsit screening customized visits to parent needs. Sessions: 10-20 minutes at visit start or via phone/telemedicine within 24-48 hours. | Intervention versus usual care showed significant improvements: anticipatory guidance score (mean 73.9 vs 63.3; AAD 11.01, 95% CI 6.44-15.59, p<0.05), psychosocial assessment completion (66.9% vs 49.9%; AAD 16.2%, p<0.05), behavioral concerns addressed (89.2% vs 82.0%; AAD 7.4%, p<0.05), up-to-date well-child care (73.7% vs 63.4%; AAD 9.9%, p<0.05). No significant reduction in ED use (≥2 visits: 37.2% vs 36.1%, NS). | 12-month project working group with clinicians, staff, parents, and leaders determined implementation adaptations. 61% of intervention parents met coach 2-4 times; 35% met 5-7 times. Greater intervention effect with cultural concordance (Latino coach + Latino parent). Successfully adapted to virtual/phone visits during COVID-19. |
| 5 | (Kangovi et al., 2018)  United States of America | Two-armed, single-blind, multicenter RCT across 3 primary care facilities (VA medical center, FQHC, academic family practice clinic) in urban, high-poverty zip codes. Study period: January 2015-March 2016 (recruitment) with 6-month intervention and 9-month follow-up. | Adults with 2+ chronic diseases in poor control (n=592 randomized; 470 completed 6-month primary outcome). Demographics: 62.5% female, mean age 52.6, 94.3% African American, 97.8% experienced traumatic event, uninsured or publicly insured (including all veterans). | CHWs as trusted laypeople from local community with high school diploma required. Screened through behavioral interviews for empathy and personality traits. Training: 1-month including in-person and online training with detailed manuals covering action planning, motivational interviewing, community resources, trauma-informed care, social needs, and child development. | Supervised by master's-level social work managers providing real-time support, ongoing training, and clinical integration assistance. Fidelity reinforced through weekly assessments: documentation audits, field observation, patient phone calls, and performance dashboard review. Compensation not specified. | Semistructured interview guides for holistic assessment, documentation software for action plans and progress tracking, action planning tools, performance dashboard for supervision. CHWs had medical record access and touchdown space at clinical sites. | IMPaCT (Individualized Management for Patient-Centered Targets): 6 months of hands-on support including coaching, social support, advocacy, and navigation. Patients set chronic disease management goals with physicians. CHWs provided at least weekly communication including monthly face-to-face contact, visited hospitalized patients, coordinated with inpatient teams, and helped identify long-term supports post-intervention. | Intervention versus control: No significant differences in self-rated physical health (difference -0.7, p=0.30), mental health (difference 0.8, p=0.41), or chronic disease control (p=0.21). Significant improvements in quality of care comprehensiveness (OR 1.8, RD 0.12, p<0.001) and supportiveness of self-management (OR 1.8, RD 0.12, p<0.001). Hospitalization outcomes: 69% reduction in total days at 6 months (155 vs 345 days), 65% at 9 months (300 vs 471 days); repeat hospitalizations (OR 0.4, RD -0.24, p=0.02); 30-day readmissions (OR 0.3, RD -0.17, p=0.04). | High engagement: 91% completed full 6 months. Mean 5.5 action plans per patient with 60.3% completion rate. Most common action plans: psychosocial issues (36.9%) and health behavior (35.6%). Standardized approach to hiring, training, workflows, supervision, documentation enabled rapid scale across 3 different institutions. |
| 6 | (Zakus et al., 2019)  Niger | Two-arm cluster RCT with 130 Relais Communautaire (RCom) from 129 villages in rural Dosso and Doutchi districts, southwest Niger (120-150km from capital Niamey). Study period: March-October 2016. | Children aged 2-59 months with diarrhea, malaria, pneumonia (n=520 assessed: 264 intervention, 256 control). Symptom prevalence: 45% cough, 10% diarrhea, 70% fever. | Volunteer RCom (unpaid) with minimum French competency; most had middle school education (62.1% intervention, 50.0% control). Demographics: 81.8% male intervention, 54.7% male control; mean age 30-40 years. Training: 10 days standard MPH iCCM training in local languages (Hausa/Zarma) covering diagnosis and treatment of uncomplicated malaria, pneumonia, diarrhea and referral of severe illnesses. Intervention group received additional 5 days on smartphone and CommCare application use. | Intervention group: double the rate of no supervision in last 3 months (31.8% vs 15.6%). Control group received more supervision (48.4% had 3+ visits vs 40.9% intervention). Trained clinician teams (MD/Nurse; MD/MPH) visited each RCom during service hours for quality assessment. Volunteers unpaid; intervention group more likely to report poor working conditions (24.2% vs 15.6%) and suggested salary would increase satisfaction. | Intervention: Samsung smartphones with contextualized French CommCare application (Dimagi Inc) for guided diagnosis/treatment protocols and drug supply control. All RCom received: rapid diagnostic tests (RDT) for malaria, timers for breathing rate, artemisinin-based combination therapy, amoxicillin, paracetamol, oral rehydration salts, zinc, MUAC tape. Control: paper records (not maintained). | WHO integrated community case management (iCCM) under RAcE program. RCom diagnosed and treated children with diarrhea, malaria, pneumonia and referred severe cases. Intervention group used CommCare smartphone application guiding diagnosis and treatment during encounters with caregivers and sick children for approximately 6 months prior to study assessment. | Quality of care (QoC) scores (0-31 points): intervention mean 26.2 (SD 2.1) versus control 25.3 (SD 1.4); mean difference 0.83 points or 3.4% higher (p=0.009). 83% intervention had QoC >80% versus 67% control. Intervention significantly better at: health screening (7.4 vs 6.4, p<0.001), asking about danger signs (convulsions 69.7% vs 50.4%; incapacity to drink/eat 79.2% vs 59.4%; vomiting 81.4% vs 69.9%; lethargy 92.4% vs 84.8%), swelling feet assessment (40.2% vs 13.3%), ACT administration (72.3% vs 66.4%, p=0.012), and referrals (85% vs 29% correct, p=0.012). Control group better at diagnosing fast breathing, bloody diarrhea, severe acute malnutrition, and treating fever. No significant differences in motivation or retention. | Niger context: ranks 187 of 188 on UN Human Development Index, 52% literacy, under-five mortality 129/1000, highest global fertility rate (7.2 children/woman). Distance challenges: 25.8% intervention and 39.1% control >30km from health center. Implementation barriers: accessing cloud services, electricity, reliable transport, distances, lack of maps. 91% intervention RCom engaged for full study. Study did not assess cost-benefit. Random audit of 20% of sample for quality assurance. |
| 7 | (Hickey, Owaraganise, Ogachi, Sunday, et al., 2025)  Kenya and Uganda | Prospective cohort study nested within ongoing cluster-RCT in rural southwestern Uganda and western Kenya. Study period: March 2023-August 2024 across 8 intervention communities. | Adults aged ≥40 years (n=15,879 in population; 91% baseline screening, 84% year 1 screening). Telehealth intervention enrolled n=919 (66% female, 13% living with HIV, mean age 62 years). Population: 55% female, 19% living with HIV. | Ministry of Health community health workers (198 CHWs across 8 communities). Training: HIV counseling and testing, BP measurement, hypertension basics (diagnostic criteria, medication names/purpose), smartphone app use for screening and telehealth support, plus 1:1 coaching for 1-5 days until proficient. | Real-time telehealth supervision by study clinicians stationed at primary health centers during CHW home visits. Clinician reviews data with CHW, talks directly with participant, provides clinical assessment/counseling, and prescribes medications via phone. Study financing for CHW stipends (amount not detailed). | Smartphone app built on open-source Medic Mobile platform with two-way electronic health record synchronization, GPS capability, automated appointment reminders and missed visit prompts. BP measurement equipment, pre-packaged medication sets based on treatment algorithm, transportation vouchers (~$5 USD). | Integrated HIV/hypertension intervention with two components: (1) Population-level multi-disease screening: HIV testing (≥15 years), hypertension screening (≥18 years) with standardized BP protocol, clinic referral for BP ≥140/90, transport voucher for BP ≥160/100; (2) CHW-facilitated hypertension telehealth for BP ≥160/100: home visits with BP measurement, adherence assessment, lifestyle counseling (salt reduction, physical activity), telehealth call with study clinician for assessment and prescribing, pre-packaged medication delivery by CHW, patient choice of clinic or telehealth follow-up. Follow-up every 4 weeks if uncontrolled (≥140/90) or every 12 weeks if controlled (<140/90). | Population-level (adults ≥40): BP ≥140/90 decreased from baseline 16.0% to year 1 6.4% (absolute decrease 9.6%, 60% relative reduction). BP ≥160/100 decreased from 6.5% to 2.1% (absolute decrease 4.4%). Among people with HIV (n=3,036): BP ≥140/90 decreased from 10.5% to 4.7% (absolute decrease 5.9%). Telehealth intervention participants: 96% received ≥1 antihypertensive, 94% had ≥1 follow-up, 82% had ≥1 telehealth visit, 81% retained at 1 year, 79% achieved BP control. Median 5 total visits (IQR 4-7): 3 telehealth (IQR 1-5), 1 clinic (IQR 1-2). | Nested within SEARCH cluster-RCT (NCT05768763). Integration with existing MoH CHW infrastructure. Multi-disease approach (HIV + hypertension screening). Patient-centered choice between clinic and telehealth follow-up. Electronic health record integration. Standardized BP measurement protocol. Pre-packaged medications. Transportation support. 90% baseline screening coverage among people with HIV. High population coverage maintained (84% at year 1). Baseline differences: Uganda 21.8% versus Kenya 11.1% uncontrolled hypertension. Study conducted in controlled research environment with study clinicians (not routine MoH clinicians). |
| 8 | (Hickey, Owaraganise, Ogachi, Sang, et al., 2025)  Kenya and Uganda | Pilot RCT with individual randomization, 2-armed, single-blind (statistician blinded) conducted in rural southwestern Uganda (2 communities) and western Kenya (1 community) at 3 government-run Level 4 health centers. Enrollment: May 12, 2022-October 16, 2023; Follow-up through October 2023. | Adults aged ≥40 years with moderate-severe hypertension (BP ≥160/100 at screening and ≥140/90 at clinic); n=200 enrolled (98 telehealth, 102 clinic control). Demographics: 67% female, median age 62, 14% living with HIV. Screened 2,965 adults; 266 (9%) had BP ≥160/100; 214 (80%) linked to clinic; 200 enrolled. Follow-up completion: 97% at week 24, 93% at week 48. | Ministry of Health CHWs conducted household screening (specific number not stated). Training: hands-on standardized BP measurement with practical competency assessment by study clinicians, HIV testing, smartphone app use (Open Data Kit), 1:1 coaching for 1-5 days until proficient. | Telehealth: real-time supervision by study clinician stationed at primary health center providing telehealth consultation during CHW home visits. Clinic control: study clinicians at MoH facility. CHWs received stipend to compensate for time (amount not detailed). | Telehealth arm: smartphones with Open Data Kit software, mobile phones for telehealth calls, automated sphygmomanometers for BP measurement, pre-packaged medication sets, glucometers for diabetes monitoring. Both arms: electronic health record (tablet-based case report forms), paper-based MoH medical records. Shared: transportation vouchers (~$5 USD) for initial clinic linkage. | Screening phase: CHWs conducted door-to-door BP screening of all adults ≥40 years (May-November 2022) with standardized protocol; BP ≥140/90 referred to clinic; BP ≥160/100 given $5 transport voucher. Telehealth arm: CHW home visits for BP measurement (standardized 3-measure protocol), adherence assessment (pill count), adherence and lifestyle counseling; CHW calls study clinician for telehealth consultation; clinician reviews data, speaks with participant, prescribes medications; CHW delivers pre-packaged medications; diabetes care also offered (glucometer, medication delivery); HIV care continued at MoH clinic (not via telehealth). Clinic control: in-person visits at MoH Level 4 health center with study clinician; patient-centered care (nursing triage, integrated HIV/diabetes care, friendly environment); integrated care for those with HIV. Both arms: initial clinic evaluation (exam, labs: creatinine, glucose, lipids, urinalysis, HIV testing if unknown); country guideline-based treatment algorithm; free medications; follow-up every 4 weeks if uncontrolled or every 12 weeks if controlled; immediate treatment for hypertensive urgency/emergency. | Primary outcome (week 24): BP control 77% telehealth versus 51% clinic (RD 26%, 95% CI 14-38%, p<0.001); moderate-severe HTN 7% versus 25% (RD -17%, p<0.001); retention 90% versus 60% (RD 30%, p<0.001); mean SBP 133 versus 141 mmHg (difference -7.5, p=0.006). Week 48: BP control 86% versus 44% (RD 42%, p<0.001); moderate-severe HTN 2% versus 15% (RD -13%, p<0.001); retention 83% versus 50% (RD 32%, p<0.001); mean SBP 133 versus 141 mmHg (difference -8.2, p<0.001). Time in care over 48 weeks: 89% versus 63% (difference 26%, p<0.001). Visits: telehealth median 6 (IQR 5-7) with 95% at home; clinic median 5 (IQR 2-6) with all in clinic. Among people with HIV (n=27): week 48 retention 100% telehealth versus 53% clinic (RD 47%, p=0.002). Patient preferences: 88% telehealth arm preferred home (76) or combination (10); 76% clinic arm preferred home (64) or combination (11). Barriers at week 48: transportation 69% clinic versus 2% telehealth; concerns about diagnosis/medications 17% clinic versus 6% telehealth. | Pilot RCT powered to detect 20% absolute difference. Individual randomization stratified by site and sex. Study clinicians (Clinical Officers), not routine MoH clinicians. Free medications provided (usual cost ~$1/month). High screening coverage (91% of population ≥40 years). 43% had prior hypertension diagnosis, only 20% taking medications at baseline. 18% had hypertensive urgency/emergency at enrollment. Baseline BP: mean 167/100 at screening, 161/96 at clinic. Comorbidities: 10% diabetes, 15.5% HIV (all virally suppressed), 23% CKD. Treatment algorithm based on country guidelines. Participants, clinicians, research assistants not blinded; statistician blinded. Study visits at weeks 24 and 48 preferentially at home. 3 call/text attempts then up to 3 in-person attempts for follow-up. Clinic arm received patient-centered care (nursing triage, integrated services, provider training). Conducted during COVID-19 period. Part of larger SEARCH study. NCT04810650. |
| 9 | (Omorou et al., 2024)  Rwanda | Mixed methods study (quantitative questionnaires + qualitative in-depth interviews and focus groups) conducted in 2 urban districts (Gasabo and Nyarugenge in capital) and 2 rural districts (Rusizi and Kirehe at extremities bordering DRC and Tanzania). Study period: November 2020-December 2021 during COVID-19 pandemic. | CHWs: n=383 recruited and trained; n=378 participated (Gasabo n=93, Kirehe n=97, Nyarugenge n=90, Rusizi n=98). Demographics: 62.7% female, mean age 36.7-45.3 years. Education: mostly primary or secondary. Employment: 55.9-73.2% unemployed in urban districts, 58.9-80.6% employed in rural districts. Functions: MCHC (11.2-33.3%), Binome (57.8-77.6%), CEHO (2.1-10.8%), Prevention (1.1-23.7%). Mean CHW experience: 7.3-10.1 years. Over 7,000 people screened. Qualitative: 19 IDI respondents (5 CHW supervisors, 5 COVID-19 taskforce members, 3 district data managers, 2 hospital directors, 4 district clinical directors); 64 CHWs in FGDs; 64 clients in FGDs. | Government CHWs recruited based on age <50 years and smartphone proficiency/availability. Trained in e-ASCov app use before deployment; >80% satisfied with training in all districts. Training covered app use and COVID-19 screening procedures. | COVID-19 taskforce at central and district levels; CHW supervisors at central and district levels; data managers. CHWs received stipends to compensate for time (amount not detailed). | e-ASCov smartphone app (contextualized digital tool developed by Kelindi, French start-up); Open Data Kit software for data entry; mobile phones/smartphones provided to CHWs; automated measurement tools implied for screening. | e-ASCov project (action-research): Phase 1 (November 2020-December 2021) trained and equipped CHWs with e-ASCov smartphone app. Phase 2 evaluated implementation. CHWs used app to: (1) detect and triage suspected COVID-19 cases through community screening, (2) enter data using Open Data Kit, (3) refer suspected cases to healthcare system for testing and management. App functionality: screening questionnaire, data collection, referral recommendations. 20% of people screened were referred to local COVID-19 testing facility. | Screening activity: Median people screened per CHW: Nyarugenge 152 (IQR 70-276), Gasabo 86 (IQR 15-160), Kirehe 48 (IQR 15-86), Rusizi 24 (IQR 16-90), p<0.001. At least 1 positive case reported: Gasabo 54.8%, Nyarugenge 38.9%, Kirehe 23.7%, Rusizi 15.3%, p<0.001. At least 1 severe case: Gasabo 21.5%, Nyarugenge 20%, Kirehe 9.3%, Rusizi 7.1%. Deaths: 2 (both in Gasabo). Satisfaction (0-100 scale): Overall: Gasabo 80.7, Nyarugenge 72.8, Kirehe 61.6, Rusizi 64.5, p<0.001. Training satisfaction: 79.1-85.1 across districts (NS). Equipment availability: Gasabo 81.2, Nyarugenge 70.8, Kirehe 54.4, Rusizi 57.9, p<0.001. Simplicity/ease: Gasabo 80.6, Nyarugenge 75.6, Kirehe 55.9, Rusizi 69.4, p<0.001. Continued use willingness: >80% in Gasabo, Nyarugenge, Rusizi; 56.7% in Kirehe, p<0.001. Perceived benefits: enhanced information sharing about COVID-19 (most common), timely decision-making, quick dissemination, quick data retrieval, paperless (avoiding infection spread), time-saving. | Rwanda has >50,000 CHWs nationwide (4 per village, 3 per 100-150 households). Pyramidal health system with CHWs at base. Urban-rural differences prominent: urban CHWs had higher education (75% >primary vs 25% rural), better smartphone proficiency, better internet connectivity; rural CHWs older, more experienced, more often married. Satisfaction higher in urban areas. Screening volume and COVID-19 positivity higher in urban areas (imported cases concentrated in capital). Main challenges: poor internet access/network, low operational knowledge among CHWs, lack of smartphones, shortage of equipment, lack of incentive/internet fees, use of personal phones, low number of trained CHWs, limited electricity access, incompatibility with CHW phones, inability to edit/correct errors, older CHWs feeling excluded. Proof-of-concept that mHealth tools can be used by CHWs for epidemic surveillance. Approved by Rwanda National Ethics Committee (752/RNEC/2020). App could potentially be extended to other disease monitoring (chronic diseases, maternal/child health). |
| 10 | (Ellis et al., 2024)  United States of America | Pilot effectiveness RCT with parallel group design; intent-to-treat analysis. Urban emergency department of 228-bed pediatric hospital serving predominantly low-income, Black population (>1,500 asthma visits/year). Recruitment: 2017-2020. | Urban adolescents with uncontrolled asthma age 12-16.9 years; n=59 enrolled (29 RFC, 30 MATCH); n=57 final analyzed; n=50 completed follow-up (88% retention). Inclusion: ≥2 asthma exacerbations (ED visits or hospitalizations) in past 6 months, prescribed controller medication, residing with legal guardian willing to participate. Demographics: 96% Black, 50.9% female, mean age 14.62, duration of asthma 11.97 years, mean ACT score 19.19 (uncontrolled). Caregivers: 94.7% female, 95% Black, mean income $30,268, moderately low SES (5.68/10). Recruitment: 403 screened, 147 ineligible, 85 not contacted, 97 refused (57% refusal rate). | CHWs hired and supervised by non-profit community agency (Kids' Health Connection) after completing extensive CHW competency training through Michigan Community Health Worker Alliance. RFC-specific training: 80-hour, two-week training including (1) asthma education for professionals, (2) practice delivering each assessment and treatment module, (3) interpersonal and relationship-building skills. MATCH: standard CHW training for case management. Staff assigned to specific arm (no crossover). | Weekly on-site clinical supervision from master's-level supervisor at community agency. Regular consultation between academic researchers and agency treatment team. Quality assurance: treatment manual with detailed session descriptions, audiorecording of sessions reviewed by supervisor for fidelity monitoring. CHWs were salaried staff of non-profit community agency. Compensation amounts not explicitly stated. | No technology tools used. Standard materials: treatment manual, asthma education materials. MATCH used standardized Wee Breathers program materials (https://aafa.org/wp-content/uploads/2022/10/wee-breathers-instructors-guide.pdf). Data collection: tablet computers or electronic links for online completion. | RFC (Reach for Control): Home and community-based family intervention adapted from Multisystemic Therapy-Health Care (MST-HC). Duration: 6 months (24 planned weekly sessions). Phase 1 (weeks 1-4): Assessment with comprehensive functional analysis - detailed interviews with adolescent, primary caregiver, other adults (school personnel); observations of asthma device skills; home assessment for environmental triggers; evaluation of barriers/facilitators across family, school, community; development of individualized treatment plan. Phase 2 (weeks 5-20): Treatment with required cognitive-behavioral skills training modules: (1) tailored asthma education and skills including environmental control, (2) problem-solving strategies, (3) daily parental supervision/monitoring, (4) behavioral contracting to reinforce adherence, (5) communication with school personnel, (6) communication with medical providers. Optional modules: parent-adolescent communication, building caregiver social support, caregiver planning/organizing skills, resource provision for non-asthma needs (housing, food, transportation, mental health). Linkage to primary care if needed. Phase 3 (weeks 21-24): Termination planning and relapse prevention. Both adolescent and primary caregiver expected to attend; extended family encouraged.  MATCH (Managing Asthma Through Case Management in Homes - Comparison): Home-based asthma case management, state-endorsed model program. Duration: 6 months (6 planned monthly visits). Content: asthma education via standardized Wee Breathers program; asthma care coordination/case management; school outreach for asthma management plan; physician outreach or linkage to care if no provider. | RFC versus standard care: ED visits decreased 1.60→0.52 (t=3.08, p<0.01, d=0.62); asthma-related ED visits decreased 1.48→0.40 (t=3.12, p<0.01, d=0.62); asthma management (FAMSS) improved 40.94→46.06 (t=3.02, p<0.01, d=-0.76). ACT, caregiver QoL, adolescent QoL improved (NS).  MATCH versus standard care: ED visits decreased 1.63→0.85 (t=2.74, p<0.05, d=0.53); asthma-related ED visits decreased 1.59→0.74 (t=2.98, p<0.01, d=0.57); caregiver QoL improved 5.21→5.69 (t=2.30, p<0.05, d=-0.49). Asthma management, ACT, adolescent QoL improved (NS).  Key finding: Both CHW-delivered interventions significantly reduced ED visits; RFC showed additional significant improvement in asthma management behaviors not seen in MATCH. | Low treatment dose but high initiation: RFC averaged 4.29/24 sessions (5.45 among initiators); MATCH averaged 3.00/6 sessions (3.63 among initiators); 80.7% received ≥1 session. High satisfaction: RFC 8.5/10, MATCH 8.9/10 for helpfulness. Home-based delivery highly valued: 89% RFC, 95% MATCH preferred home setting; reasons included convenience, flexibility, comfort, adolescents more relaxed, eliminated travel barriers (gas cost, childcare, time savings), personalized experience. Treatment duration acceptable: 84% RFC, 89% MATCH found 6-month duration appropriate. Valued content (both groups): increases in asthma knowledge/skills, working with healthcare providers, school collaboration. Valued RFC-specific: improvements in parent-child relationship, spillover to extended family, addressing non-asthma needs (clothing, school supplies, bill payment, counseling referrals), CHW support during meetings with schools/providers. CHW relationship critical: described as helpful, kind, friendly, accommodating, relatable, patient, genuine concern, understanding, invested, engaging whole family. Some challenges: CHW not always sensitive to abilities/needs, described as "overwhelming" by some, difficulty getting in touch, reliability issues with arrival times, scheduling/rescheduling difficulties. University-community agency partnership; community agency already providing home-based services including MATCH; intervention delivered by agency staff, data collection by university research assistants to minimize bias. High refusal rate: 57% refused participation citing lack of interest or time. |
| 11 | (Naidoo et al., 2018)  South Africa | Qualitative exploratory study using focus group discussions and participant interviews; thematic content analysis using Consolidated Framework for Implementation Research (CFIR). Rural, community-based in Greater Giyani and Greater Letaba sub-districts. Study period: January-August 2016. CBHP rolled out from 2013; as of mid-2016, 149 active WBOTs covering 123 of 125 wards (98%), supporting 222,261 registered households (75% of total). | Total participants: 109. Community members: 38 in-depth interviews; CHWs: 11 focus groups; Facility nurses: 12 focus groups; Team leaders: 9 in-depth interviews; Community leaders: 21 in-depth interviews; Social workers: 10 in-depth interviews. Convenient sampling (based on availability at time of 3 attempted visits). Inclusion: adults >18 years. Saturation reached. | Ward-Based Outreach Teams (WBOTs) as part of South Africa's PHC re-engineering strategy introduced by National Department of Health in 2012. Team composition: 1 team leader (professional nurse) + up to 6 CHWs per team. Catchment: 250-400 households per WBOT. Training: not explicitly detailed but CHWs reported receiving initial training that equipped them with adequate knowledge and skills to conduct HIV-related work. CHWs expressed desire for ongoing training to keep abreast with current HIV knowledge. | Team leaders: professional nurses employed by NDoH. Management: non-profit organizations manage and remunerate CHWs. Technical support: Anova Health Institute (South African NGO) provides technical support to HIV programme. Supervision challenges: CHWs expressed need for better support from management and more involvement from superiors; unclear reporting structures (CHWs report to both NPO and PHC re-engineering program monthly); operational managers at clinics have limited involvement with CHWs and team leaders. | Equipment provided: blood pressure machines, weight scales (CHWs grateful; community members responded positively). Limited resources: stationery, telephones relatively limited; CHWs sometimes contribute own money to buy stationery. Infrastructure challenges: very small office space at facilities (sometimes next to sluice room, not conducive); no dedicated meeting space. Lack of personal protective equipment: no masks, hand gloves, or aprons for home visits to sick patients. | Community-Based HIV Programme (CBHP) delivered by WBOTs as part of South Africa's PHC re-engineering strategy. CHW HIV Programme Activities: (1) HIV prevention education: information provision to educate individuals on preventing HIV transmission, teaching about HIV/AIDS, CD4 counts, treatment importance; (2) HIV testing identification: identifying individuals at risk who should be tested for HIV, referring for testing (CHWs don't carry testing supplies); (3) Adherence support: provision of adherence support for those on ART, tracing individuals with missed appointments and defaulters to improve retention in care, reminding individuals to collect medication; (4) Health monitoring: early identification of individuals with deteriorating health on ART to reduce morbidity/mortality, monitoring vulnerable patients. Additional services: home-based household visits, health education on HIV and other chronic illnesses (diabetes, hypertension), cooking and cleaning for sick individuals living alone, washing clothes for bedridden patients, fetching water, making soft porridge, linkage to primary care if no provider, assistance with medication access/insurance barriers, communication with schools, distribution of medication to households if patients unable to visit facility, resource provision/referrals for non-health needs (clothing, school supplies, bill payment assistance, counseling referrals), defaulter tracing (clear processes in place). Service delivery model: home-based visits to households in allocated catchment area; relationship building emphasized as important. | Qualitative assessment of facilitators and barriers to HIV programme implementation using CFIR framework with 5 domains: (1) intervention characteristics, (2) outer setting, (3) inner setting, (4) characteristics of individuals, (5) implementation process.  POSITIVE FINDINGS - Facilitators: Community members generally valued HIV services provided; high satisfaction with CHW delivery; community receptive to health education about HIV and chronic illnesses; community leaders expressed gratitude for CHW contributions (identification of at-risk individuals, adherence support); facility nurses reported improved workload at facilities due to home-based care; CHWs highly motivated and find work rewarding; CHWs have wealth of knowledge about community health needs; CHWs report adequate knowledge and skills for HIV work; positive impact noted by community leaders ("less death" since CHWs working); community comfortable disclosing HIV status to CHWs; some traditional healers educated and supportive; clear processes for defaulter tracing.  NEGATIVE FINDINGS - Barriers: Variable patient needs impact implementation (some require extensive assistance); large number of households to visit with limited CHWs; CHWs unable to achieve daily targets; some community members refuse to engage/chase CHWs away; outer setting challenges include stigma, non-disclosure of HIV status, denial, fear; poverty (lack of transport money, no food to take with medication); patients provide incorrect contact information making defaulter tracing difficult; religious beliefs interfere with healthcare-seeking; lack of formal programme and unclear reporting structures; networking gaps include limited support from NDoH, NGOs, OPMs, social workers; inadequate integration into facilities; social workers don't follow up on referrals; some traditional healers negatively influence health-seeking behavior; inner setting issues include CHWs not always welcomed/accepted; safety concerns (health and physical); insufficient protective equipment; social workers' roles unclear; limited resources and infrastructure; CHWs undertake tasks not in line of duty (cooking, fetching water); high team leader workload (balancing two roles); desire for ongoing training despite adequate knowledge. | High variability in patient needs (some require brief visits, others extensive assistance). Large households-to-CHW ratio; limited CHW deployment; inability to achieve daily targets. Need for additional CHW employment, re-assessment of daily targets, provision of transport. Relative advantage: valued services include direct assistance, health education, medication reminders, household chores for sick; comfortable disclosure of medical information/HIV status to CHWs; positive community perception; reduced facility workload; better identification of problems in community; however not universally accepted. Networking barriers: lack of support from NGOs, NPOs, NDoH, OPMs, social workers; poor integration of HIV programme into facilities. Patient needs and resources: stigma (denial and fear prevent healthcare access, patients avoid CHWs, non-disclosure of HIV status, religious beliefs interfere); poverty (no transport money leads to defaulting, lack of food to take with medication, patients in wheelchairs can't access clinics; CHWs distribute medication at households). External policies and incentives: need for formalization by integrating WBOTs into NDoH; unclear CHW roles (undertaking non-health tasks); undefined reporting structures (report to both NPO and PHC program monthly); high workload for team leaders (professional nurses with dual roles); inadequate stipends lead to demotivation; however CHWs find work satisfying due to positive impact which serves as motivation. Implementation climate: unacceptance by some community members ("they would chase us and even swear at us"); lack of protective equipment (masks, gloves, aprons) creates safety concerns; clear defaulter tracing processes; insufficient social worker involvement; poor integration into PHC workflows. Readiness: desire for more involvement from superiors and stronger support; grateful for equipment (BP machines, weight scales); other resources limited (stationery, phones) - "we have to contribute money to buy stationery"; desire for ongoing training; inadequate infrastructure ("very small office space", "next to sluice room", "no place where we can place them"). Characteristics of individuals: CHWs motivated ("We do have something rewarding, because when we find someone sick we are able to refer"); wealth of knowledge about community; adequate knowledge/skills ("we knew and understood what we are supposed to do"); initial training useful ("equipped us with enough information"); desire for additional training and new knowledge. Implementation process: importance of relationship building with community to mitigate challenges; campaigns and trainings held with CHWs, team leaders, community members; external change agents engaged (NGOs, NPOs); community leaders and traditional healers engaged; traditional healer influence mixed (some educated and supportive, others cause problems by promoting traditional healing over clinic visits); need for better relationship building with traditional healers; ongoing engagement essential. Critical success factors: relationship building with community and stakeholders, integration at facility-level, clear role definition, adequate resources, formalization of programme, increased stipends, better infrastructure, ongoing training, engagement with traditional healers, strengthened social worker linkages. |
| 12 | (Comfort et al., 2016)  Madagascar | Randomized controlled trial with individual randomization; ordinary least-squares regression with month-fixed effects and district-fixed effects; 4-month follow-up period. Rural, community-based in Aloatra Mangoro, Atsinanana, Analanjirofo regions (remote areas at least 5 km from nearest health center; 64% of women live 5+ km, 40% live 10+ km from nearest health center). Community-based distribution program supported by USAID's Santénet2 project (2008-2013). Study period: April-July 2013 (training), followed by 4 months data collection. | CHWs who sell injectable and oral hormonal contraceptives in rural areas; n=622 CHWs eligible and randomized (311 treatment, 311 control). Excluded before randomization: top 5% for FP clients (n=36), two hard-to-reach districts (n=48). Final analyzed sample: n=535 CHWs (272 treatment, 263 control). Attrition: 13% treatment and 15% control didn't attend training. Among training attendees: treatment group submitted 74% of monitoring forms, control 72% (NS). Monthly observations: 784 treatment, 770 control across 4 months. Overall monitoring form compliance: 68% submitted ≤3 of 4 required forms; 17% submitted no forms. | Lay health workers without formal professional training; live within communities where they serve; recruited in rural areas ≥5 km from nearest health center. Each village typically has 1-2 CHWs. Demographics: average age 43 years, 65-72% female, 86-83% married, average 4.3-4.5 children, 90% farmers. CHW profile: live average 118-130 minutes walking distance (about 2 hours) from nearest health center; average 65-70 months (5-6 years) working as CHW; work 17-20 hours per week as CHW; travel average 18 km to replenish health products for resale; profit per week as CHW: $0.70-0.80; household spending per week on food: $12.60-14.00; highest education: 7th class (equivalent to 5th grade US); 78-81% ever used FP personally; 63-65% personally use injectables; average 36-38 months since training on injectables.  Historical context: 2006 policy revised to allow eligibility checklist use (previously could only provide at menses); 2008 all CHWs trained on eligibility checklist combining pregnancy questions with medical eligibility questions for hormonal contraceptives. Despite training: only 15% of initial 2007 cohort said they could provide injectables to nonmenstruating women; 94-95% report using pregnancy checklist; however only 46% believe checklist is "very reliable"; 90-93% instructed not to provide to nonmenstruating women; only 5-7% believe they can provide to nonmenstruating women.  Study training (April-July 2013): All CHWs invited to training (not told what it was about - common practice); random assignment occurred BEFORE training invitation; all CHWs trained on completing monthly reporting form. Treatment group additionally received: (1) supply of 50 free pregnancy tests, (2) training on how to use tests, (3) told tests have low false-positive rate, (4) told tests detect pregnancy 10 days after fertilization, (5) NOT specifically instructed to use for prescribing hormonal contraceptives (exploratory approach to identify pathways), (6) NOT told to use as complement or substitute for checklist. Training sessions: treatment and control CHWs in same district attended same location but staggered by 1 day. | CHWs employed by National Department of Health but remunerated and managed by non-profit organizations. Technical support: Anova Health Institute provides technical support to HIV programme. Reporting: CHWs maintain individual client records; submit monthly aggregate data to local health center on number and type of contraceptive clients; report to both NPO and PHC re-engineering program monthly (dual reporting creates confusion about who they work for). Study monitoring: monthly data collection via self-reported monitoring forms submitted by CHWs over 4 months; data collected by CHWs themselves (not independent observers); compliance incentivized through monthly payments. Challenges: no detailed supervision model described; limited involvement of operational managers at clinics with CHWs; CHWs expressed need for better support from management and more involvement from superiors.  Financial compensation: minimal stipends (exact amounts not stated); CHWs sell contraceptives at small profit to clients; CHWs earn average $0.70-0.80 per week profit from CHW work. Study participation compensation: training attendance reimbursed for transportation costs and per diem; monthly monitoring data submission incentives: first 3 months $3.12 USD per month, month 4 $4.90 USD. Adequacy issues: CHWs, team leaders, and community leaders shared opinion that stipends should be increased; low stipends result in CHWs feeling demotivated; however CHWs report finding work satisfying due to positive community impact, which serves as intrinsic motivation despite low pay. | Treatment group: 50 free urine pregnancy test kits per CHW; cost: tests cost less than $0.10 (10 cents) each; test characteristics: low false-positive rate (nearly 0%), can detect pregnancy starting 10 days after fertilization, easy to administer. No other technology: no mobile phones, no electronic data tools, no special equipment mentioned. Existing equipment: CHWs already had blood pressure machines and weight scales (from separate program - not part of this study). Paper-based individual client records; paper monthly reporting forms. | Community-based contraceptive distribution program - CHWs sell short-acting hormonal contraceptives to women in rural areas who otherwise have limited access to FP providers. CHW services include: (1) FP counseling: provide family planning counseling to potential clients; (2) Pregnancy screening: use pregnancy checklist to assess pregnancy status (treatment group also has pregnancy tests); (3) Method eligibility screening: assess medical eligibility for hormonal contraceptives; (4) Contraceptive sales: sell short-acting methods including injectable contraceptives (most popular - DMPA), oral contraceptives, condoms, fertility-awareness method using cycle beads; (5) Client follow-up: visit new and existing FP clients; (6) Recordkeeping: maintain individual client records, submit monthly aggregate data to local health center. Service delivery locations: home visits - CHWs visit clients at their homes (can also provide services from CHW's own residence).  Historical context - pregnancy assessment: Pre-2006 CHWs could only provide hormonal contraceptives during menses; 2006-present policy allows use of 6-question pregnancy checklist to rule out pregnancy; checklist combines pregnancy questions with medical eligibility questions; current practice issues: checklist has false-positive rate 11-61% (many non-pregnant women incorrectly denied contraceptives), some CHWs don't view checklist as reliable and continue requiring menses, women denied contraceptives until menses may become pregnant in interim.  Study intervention: Treatment group received free pregnancy tests as potential (1) complement to checklist (reduce false-positives), or (2) substitute for checklist (CHWs decide); CHWs not specifically instructed on use pathway (exploratory design); pregnancy tests should be used WITH checklist because tests ineffective between fertilization and menses (checklist has 22% false-negative rate during this period). Control group: continue standard care using checklist alone, no pregnancy tests provided, received same training on monthly reporting.  Hypothesized pathways for impact: (1) Confirmation pathway: tests confirm/substitute for checklist CHWs don't trust → more women correctly identified as not pregnant → more contraceptive sales; (2) Demand generation pathway: free tests induce women to approach CHWs → opportunity for FP counseling → more contraceptive sales. Study unable to distinguish between pathways (no difference in number of FP counseling sessions between groups). | Primary outcome: monthly number of new hormonal contraceptive clients per CHW (includes both injectable and oral); measured via CHW self-reported monthly monitoring forms over 4 months. Secondary outcomes: number of new injectable clients per month, number of new oral contraceptive clients per month, number of individual FP counseling sessions per month, frequency of pregnancy checklist use.  New hormonal contraceptive clients: treatment 3.14 clients/month versus control 2.48 clients/month; difference 0.65 clients/month (95% CI 0.13-1.18, p=.014); effect size 26% increase (statistically significant). Injectable clients: treatment 1.94 versus control 1.51; difference 0.44 (p=.029); effect size 29% increase (statistically significant). Oral contraceptive clients: treatment 1.19 versus control 0.97; difference 0.22 (p=.133); effect size 22.5% increase (NOT statistically significant - similar magnitude but smaller numbers). Intermediate outcomes - no significant effects: individual FP counseling sessions: treatment 17.72 versus control 16.49, difference 1.23 (p=.262); frequency of checklist use: treatment 2.61 versus control 2.59, difference 0.01 (p=.980).  Key finding: Providing CHWs with free pregnancy tests significantly increases number of women obtaining hormonal contraceptives by 26%, primarily driven by increase in injectable contraceptive clients (29% increase). | Context - access barriers: 64% women live 5+ km from nearest health center; 40% live 10+ km further; community-based distribution critical for access; 21% contraceptive use, 18% unmet need in region; Madagascar first sub-Saharan African country to allow CHW injectable administration. Facilitators - pregnancy test advantages: easy to administer, low false-positive rate (nearly 0%), detect pregnancy 10 days after fertilization, increasingly affordable ($0.10/test); CHWs feel more comfortable: 97-99% prefer pregnancy test over checklist; only 46% think checklist is "very reliable". Facilitators - CHW motivation: CHWs intrinsically motivated by community impact; find work rewarding despite low pay; long tenure (average 65-70 months as CHW); integrated into communities they serve.  Barriers - policy/training issues: despite 2008 checklist training, 90-93% CHWs instructed NOT to provide to nonmenstruating women; only 5-7% believe they can provide to nonmenstruating women; confusion about checklist reliability and appropriate use; need for improved training on checklist + pregnancy test complementary use. Barriers - checklist problems: false-positive rate 11-61% (many non-pregnant women denied contraceptives); only 46% CHWs think checklist "very reliable"; some CHWs still require menses despite checklist training; women denied contraceptives may become pregnant while waiting for menses. Barriers - data quality: low monitoring form compliance (17% submitted no forms, 68% submitted ≤3 of 4 forms); self-reported outcomes (potential bias); 13-15% didn't attend training. Barriers - contextual: study during harvest season (may reduce CHW availability - 90% are farmers); some contraceptive stockouts during intervention; hard-to-reach remote areas; CHWs report experiencing product shortages (86% any shortage, 22-35% injectable shortage). Barriers - pregnancy test limitations: tests ineffective between fertilization and menses (need to complement with checklist); potential for false-negatives if used too early; risk of inadvertently prescribing to recently pregnant women if test used alone; need for follow-up training on complementary use. |
| 13 | (Koniak-Griffin et al., 2015)  United States of America | Randomized Controlled Trial (RCT); Community-based intervention in Los Angeles among immigrant Latina women; implemented through community centers, schools, and churches. | 223 low-income Latina women (aged 35–64 years), mostly of Mexican descent; overweight/obese with risk factors for cardiovascular disease; 6-month intervention with 9-month follow-up. | Community Health Workers (CHWs) referred to as Promoters; high school education, ≥4 years' experience; selected via community advisory board. Received 100-hour training covering curriculum delivery, behavior change strategies, ethics, and human subjects protection. No refresher training reported. | Supervised by research staff and project director through meetings and periodic observations. Compensation was paid; non-financial incentives included recognition and participation in community health networks. | Curriculum manuals, visual aids, pedometers, accelerometers (for evaluation), exercise DVDs, and food/activity diaries used for monitoring behavior change and self-tracking. | Health promotion and disease prevention focused on cardiovascular risk reduction. Components: 8 weekly group classes (2 hours each) + 4 months of individualized coaching (4 home visits + 4 phone calls). Topics included physical activity, diet, and stress management. | •Significant improvements in dietary habits (p = 0.009) and heart disease knowledge (p < 0.001).  • Physical activity maintained while control declined (p = 0.04).  • Reduction in waist circumference (p = 0.04).  • BMI and weight significantly reduced in high-intensity subgroup (p ≈ 0.046).  • No significant changes in blood pressure, lipids, or glucose levels. | Enablers: Cultural tailoring, promoting trust, emotional/social support, and strong participant engagement (87% retention, >70% attendance).  Barriers: Environmental limitations—lack of safe exercise spaces and limited access to affordable healthy food.  Feasibility: High—intervention well-accepted, strong adherence, and community collaboration with UCLA School of Nursing. |
| 14 | (Duffy et al., 2025)  Guatemala | Cross-sectional; rural community-based setting (lower-middle income country) | 359 adults (≥18 years); mixed gender; excluded if pregnant or unable to measure BP | 6 trained CHWs from rural NGO program; basic secondary education; prior CHW training; 3-day intensive training on BP measurement, mHealth app (CommCare), and data entry | Supervised weekly by physician & project coordinator; field review model; compensated (amount not reported); non-financial incentives: training certificate & access to tools | CommCare mHealth application, smartphone, BP monitor, scale, height board | Screening and health education on hypertension; individual one-time 20-minute assessment per participant | 92.8% agreement between CHWs and doctors in hypertension diagnosis; Kappa = 0.80 (95% CI: 0.72–0.88); Mean bias for SBP = –1.51 mmHg, DBP = –0.93 mmHg (p > 0.05); no significant effect of demographics | Enablers: adequate training, digital tool support, supervision, and system linkage; Integration: CHWs linked to local health posts; resources supported by facility (BP calibration, referral coordination) |
| 15 | (Myers et al., 2019)  South Africa | Mixed methods; mixed urban–rural PHC clinic settings; upper-middle income country | 40 adults (≥18 years) with HIV or diabetes, screened positive for probable depression (CES-D >16) and/or hazardous alcohol use (AUDIT >8) | 7 CHWs; high school education; prior HIV adherence counselling experience; 3-day training on screening (AUDIT, CES-D), MI & PST counselling, ethics, and referral protocols; refresher training provided | Weekly supervision using a tiered model (psychologist → registered counsellor → CHWs); paid; non-financial incentives: recognition, skills development, professional growth | Manual tools (CES-D, AUDIT forms, counselling handbook, audio recorder); no digital case management | Three individual counselling sessions (45–60 min) integrating motivational interviewing (MI) and problem-solving therapy (PST); screening for depression/alcohol use; referrals for severe cases; home exercises | 553 screened, 40 enrolled (22 HIV, 18 diabetes); 85% completed all 3 sessions, 90% follow-up retention; women showed higher interest (74% vs men 46%, p=0.018); rural participants had higher completion (95% vs 75%, p=0.04) | Enablers: effective supervision, supportive clinic management, client acceptability, skill transfer to routine work. Barriers: short training, workload conflicts, lack of privacy, male under-participation, and coordination gaps between |
| 16 | (Lukyamuzi et al., 2022)  Uganda | Quasi-experimental; rural setting (low-income country) | 245 adults living with HIV, aged 25–37 years; mixed gender | 48 CHWs selected by community vote; basic education; on-the-job MoH training (3 days) on HIV counselling, disclosure skills, ethics, handling adverse events; no refresher training | Monthly supervision by investigators and health facility team; paid (50,000 UGX ≈ US$15/month); non-financial incentives: certificates, T-shirts, community recognition | Mobile phones for follow-up, counselling guides, visit logbooks | Community- and home-based counselling, phone follow-ups, disclosure skill training, partner preparation for HIV disclosure | HIV partner disclosure increased from 0% to 74.4%; men 24% more likely to disclose (aRR=1.24, p=0.004); membership in HIV groups improved disclosure (+18%); negative attitude reduced it (–21%, p=0.001); 12.3% reported mild adverse events (no sig. difference); 60.8% of disclosed partners tested for HIV | Enablers: home-based support, ongoing psychosocial counselling, male engagement, peer support, and integration with health system. Barriers: HIV stigma, fear of adverse outcomes, limited CHW motivation, quasi-experimental design bias, and gender-power dynamics. |
| 17 | (Frisby et al., 2022)  South Africa | Implementation study (feasibility); Community-based, rural, lower-middle-income setting | 152 adults with self-reported hearing difficulties; age 18–102 (mean 59.1 ± 14.9); mixed gender; bilateral hearing loss ≥26 dB HL; normal middle ear via otoscopy; first-time users; access to WhatsApp | 3 CHWs, local community members fluent in Xhosa, previously trained by hearX Foundation for child hearing screening; 2 years prior experience in community screening | Supervision model not specified; likely remote or periodic oversight by hearX Foundation; compensation type not specified | mHealth technologies via hearX platform and smartphone-based hearing assessment; WhatsApp used for communication and follow-up | Screening for adult hearing loss; CHWs conducted mobile-based hearing assessments; follow-up at 6 months after fitting; participants purchased batteries monthly | Demonstrated feasibility of CHW-delivered community hearing care using mHealth; successful adult screening and follow-up; increased access to basic hearing care services in underserved rural areas | Implementation supported by prior CHW training, mHealth tools, and community integration; challenges include resource limitations and supervision structure; sustainability dependent on continued training, support, and affordability of hearing devices |
| 18 | (Garg et al., 2022)  India | Cross-sectional household survey; rural, community-based setting; lower-middle-income country | 1,928 caregivers of children aged 2–6 months; caste composition: ST 37.8%, SC 15.1%, OBC 44.2%, General 2.9%; majority mothers (69.2%) with > primary education | CHWs known as ASHA/Mitanin; HBNC (Home-Based Newborn Care) training initiated in 2008, most completed by 2011; refresher training conducted; responsible for six home visits after delivery, newborn screening, management with amoxicillin, and referral when necessary | Supervision model not described; integrated within National Health Mission (NHM) structure; paid incentive INR 250 per completed HBNC case | HBNC kit, amoxicillin tablets, job aid booklet; no digital tools used | Six structured home visits for newborn care counseling, screening, and treatment when required; counseling on breastfeeding, hygiene, warmth, colostrum, and recognition of danger signs; referral of sick newborns to facilities | High coverage and performance: ≥6 HBNC visits in 74.1% households; 90.8% institutional deliveries; 84.3% ASHA presence at delivery; >80% mothers received key newborn care advice; 12.9% newborns identified as sick, 48.1% referred, 34.7% treated with amoxicillin | Strong integration with public health system (NHM); effective coverage and adherence; gaps in supervision detail and consistency; limited technological or infrastructure support |
| 19 | (Shrestha et al., 2022)  Nepal | Cluster Randomized Controlled Trial (CRCT); semi-urban, community-based setting; lower-middle-income country | 690 women aged 30–60 years (277 intervention, 413 control); married, literate, diverse ethnic backgrounds | 16 Female Community Health Volunteers (FCHVs) across 7 intervention clusters; married, literate, motivated; prior maternal–child health experience; trained for 3 days on cervical cancer etiology, symptoms, screening, referral, and record-keeping | Field supervisors and nursing officers conducted monitoring visits and checklist reviews; paid US $5 honorarium per participant; received recognition and community engagement as non-financial incentives | Manual tools only; flip charts, pamphlets, referral slips, and registers (no digital technology used) | Home visits every 4 months for one year; individual counseling on cervical cancer and screening (VIA); referral and follow-up at local health facilities; distributed IEC materials | Screening uptake increased from 42.5% → 73.2% in intervention (RR = 1.48, p < 0.01); knowledge scores rose significantly (median 2 → 6); control group showed minimal change | Enablers: high community trust, cultural tailoring, effective referral linkages. Barriers: COVID-19 disruptions, service interruptions, FCHV workload strain, limited supervisory capacity for scale-up |
| 20 | (McAtee et al., 2024)  United States of America | Quasi-experimental implementation study; urban, community-based program; high-income setting | 130 adults aged 20–82 years; patients at high or rising risk of chronic disease with uncontrolled indicators | Certified Community Health Workers (CCHWs); certified by Rhode Island Certification Board; trained in CVD/DM management, motivational interviewing, CPR/AED, nutrition, and social determinants of health | Supervised within Community Health Teams under Rhode Island Department of Health; regular case reviews and quarterly reporting; compensation paid (amount not stated); professional certification and team collaboration as non-financial incentives | Digital tools: SurveyMonkey for HRA reporting, Excel for tracking; telehealth infrastructure used during COVID-19 | Individual health coaching sessions (at least 2 per participant, 6–8 weeks apart); risk assessment, education on CVD/DM, referrals to lifestyle programs, and linkage to primary care | Improvements observed in BP, LDL-C, and HbA1c (trend-level, p=.065); significant increase in patient confidence and self-efficacy; limited measurable change due to short follow-up | Fully integrated with primary care and public health systems; enablers: patient empowerment, structured follow-up, education; barriers: COVID-19 disruptions, short intervention duration, staff turnover |
| 21 | (Baynes et al., 2018)  Tanzania | Cross-sectional study; rural, community-based setting; lower-middle-income country | 300 sick child consultations conducted by 60 CHWs; children aged 2 months–5 years; mixed gender; excluded those under 2 months or needing immediate referral | WAJA (Wawezashaji wa Afya ya Jamii); 142 total CHWs recruited, 60 sampled; all had secondary education (Form Four); 9-month formal training at TTCIH on IMCI, CCM, health promotion, HIV/STI prevention, family planning, and newborn care | Facility- and village-based supervision; 2 IMCI-related facility visits + 1 village supervision per quarter; CHWs paid and recognized as civil servants; non-financial incentives: community recognition and formal status | IMCI job aids, malaria RDTs, ACT, amoxicillin, ORS, zinc, paracetamol, MUAC tapes, thermometers, timers; mobile phones used for timing and m-RDT results | Assessment, classification, and treatment for malaria, pneumonia, and diarrhea under the CCM/IMCI algorithm; referral of danger signs; counseling for caregivers | High adherence to IMCI standards: correct classification (73%), correct treatment of CCM-treatable illnesses (78%); malaria correctly treated in 84%, pneumonia 74%, diarrhea 71%; 66% referred correctly; 74% caregivers received counseling; 67% could recall treatment steps | Strong health system integration (linked to CHMT); supported drug supply; 79% had complete stock of essential CCM drugs; enablers: intensive training and supervision; barriers: variable physical danger sign checks (only 39%) |
| 22 | (Regan et al., 2023)  Tanzania | Cluster-randomized pragmatic trial; urban and mixed setting; upper-middle-income country | 243,918 women of reproductive age; data from routine ANC facility logbooks; followed through pregnancy (no postnatal data) | Community Health Workers (Home-Based Carers); predominantly female, secondary school education; selected by local committees; trained 5 days + annual refresher by MDH; role in pregnancy identification, counseling, and ANC referral | Structured supervision by outreach nurses and CHW coordinators; monthly meetings; supervisors from district health management teams; paid stipend USD 35/month; non-financial incentives: recognition, supervision, refresher training | Tools: ANC referral cards, home-visit registers, flip charts, reporting forms; no digital tools reported | CHWs identified pregnant women, conducted home visits, provided ANC counseling, encouraged partner involvement, tracked missed visits, and coordinated with facilities for follow-up | Significant increase in ANC utilization: ≥4 visits rose from 6.6% → 9.3% (RR 1.42, p=0.02); mean ANC visits +7.7%; early ANC (≤12 weeks) showed minimal change; no significant difference in stillbirths, LBW, or neonatal deaths | Fully integrated within public primary healthcare system; collaboration with ANC clinics and district health teams; enablers: structured supervision, refresher training, and community linkage; barriers: not detailed |
| 23 | (Justvig et al., 2017)  United States of America | Prospective descriptive study conducted in community and home-based pediatric medical home settings at Stony Brook University Hospital, New York (USA) from May 2013 to October 2014. Aim: Identify domains of CHW-delivered support that help families adhere to pediatric care recommendations. | Families with children aged 0–17 years enrolled in the *Enriched Medical Home Intervention (EMHI)*; 88 at-risk families (children 0–17 years old) from 259 enrollees (46 completers, 42 non-completers). | Community Health Workers (CHWs) recruited from local communities; non-clinical background; culturally matched to families; > 60 hours standardized training (didactic + shadowing) on newborn care, chronic diseases (asthma, diabetes), communication, motivational interviewing, and data entry using REDCap | Supervised by clinical and program staff at Stony Brook University Hospital; close coordination with pediatricians; feedback through regular meetings; compensation integrated within hospital employment (not specified). | REDCap electronic data system for documentation, psychosocial risk assessment, and visit summaries; phone/text follow-ups; printed and internet-based educational materials (e.g., Text4baby). | For CHWs: Structured home-visit protocol addressing seven goal domains and 17 task areas  For families:Home visits between pediatric appointments; CHWs provided tailored health education, assisted appointment scheduling, medication review, adherence follow-up, family record-keeping, and connection to community resources (e.g., WIC). | 52% program completion (46 families); Hispanic families and those with newborn/record-keeping goals more likely to complete (p < 0.05). Frequent CHW tasks: appointment logistics, medication management, and health education. Improved adherence to pediatric care; inter-rater reliability > 0.8. | Enablers: Integration into pediatric medical home, culturally matched communication. Barriers: Transportation barriers, language issues, and incomplete recording of CHW field activities. |
| 24 | (Fisher et al., 2025)  United States of America | Mixed-methods study using an exploratory sequential design conducted in the Bronx Healthy Start Partnership (BxHSP), New York City. Qualitative interviews (June–Oct 2020) and quantitative online surveys (Nov–Dec 2022) were carried out as part of a quality improvement evaluation. | Interview participants: n = 16 (purposefully selected BxHSP clients who gave birth before March 2020 and received ≥1 CHW home visit). Survey respondents: n = 62 (from 379 eligible open cases). Participants mostly women aged 25–34 years, 44% Black/African American, 38% Hispanic/Latinx/e, 19% Spanish-speaking. | CHWs recruited from local Bronx communities; culturally and linguistically aligned with participants. Delivered home visits, education, outreach, and referrals to social and medical services. Training not specified but aligned with HRSA Healthy Start standards emphasizing life-course approach and culturally responsive care | Supervised under Bronx Healthy Start Partnership (funded by HRSA) with oversight from The New York Academy of Medicine evaluators; CHWs collaborated with clinicians, program staff, and the Community Action Network for quality improvement input. Compensation details not specified | CHWs utilized phones, text messages, and online communication platforms to maintain contact with participants, especially during CHWs in the Bronx Healthy Start Partnership (BxHSP) applied phone communication, text messaging, and home visit documentation systems as part of their routine outreach and follow-up activities | CHWs conducted home visits, phone follow-ups, and workshops, offering psychosocial support, health education (safe sleep, breastfeeding, contraception), and connections to social services (e.g., insurance, nutrition aid, mental health counseling, doulas). | CHW-led support increased HIV status disclosure (8.76 vs 5.15 per 1,000 person-days; aHR = 1.72, 95% CI: 1.10–2.70) and shortened time to disclosure (89 vs 112 days), indicating that structured CHW engagement effectively promoted timely and safe partner communication. | Enablers: strong CHW–participant relationships, cultural congruence, psychosocial & material support, consistent communication, and multi-language services. Barriers: low response rate (selection bias), recall bias, COVID-19 service disruption (shift to virtual), and incomplete representation of minimally engaged participants. |
| 25 | (Lukyamuzi et al., 2023)  Uganda | Quasi-experimental study conducted in the greater Luwero region, Uganda (Luwero, Nakaseke, Nakasongola districts). Data collected Oct 2019–May 2020 with six-month follow-up. | 245 participants (230 completed): 112 in intervention, 118 in control arm. Adults living with HIV (ALHIV), aged 18–55 years, in heterosexual relationships ≥3 months, not yet disclosed to primary partner. | 48 CHWs (aged 25–60) recruited from the same communities; trained for 3 days on HIV counseling, disclosure skills, ethics, confidentiality, and managing adverse events. Training used didactic + role play methods with pre/post assessments. | Supervised via regular phone calls and meetings with the study team. CHWs submitted home-visit and call logs. Each received a monthly facilitation & transport allowance of 50,000 UGX (~$15). | CHWs used mobile phones for scheduled follow-up (two calls/week) and documentation logs for home visits. No digital platform or specialized app mentioned; tools were simple and community-based (calls, forms, and face-to-face meetings). | CHW-led disclosure support mechanism: CHWs met participants to plan disclosure, conducted two weekly phone calls and home visits, provided counseling on disclosure skills, assessed partner’s attitude, and arranged for couple HIV counseling/testing when appropriate. | The CHW-led intervention significantly accelerated and increased HIV status disclosure among heterosexual partners. Disclosure incidence was higher in the intervention group (8.76 vs 5.15 per 1,000 person-days; p < 0.001) with a shorter median time to disclosure (89 vs 112 days). Participants receiving CHW support were 1.72 times more likely to disclose (aHR = 1.72; 95% CI: 1.10–2.70). Male gender, higher education, and longer relationships predicted earlier disclosure, showing that structured CHW engagement effectively enhanced communication, psychosocial readiness, and safe partner disclosure within the community. | Enablers: trained local CHWs, structured supervision, regular follow-ups, verification of disclosure events, and linkage to facility counselors. Barriers: non-randomized clusters (selection bias), gender imbalance (more women), and potential contamination across sites |
| 26 | (Tomlinson et al., 2015)  South Africa | Cluster randomized controlled trial conducted in 26 neighborhoods of Cape Town, South Africa (May 2009–September 2010; follow-up to 6 months postpartum). The study aimed to evaluate whether home visits by trained CHWs through the *Philani Intervention Program* could improve infant growth outcomes among mothers experiencing antenatal depression compared with standard clinic-based care | 1,238 Neighbourhoods pregnant women (98% recruitment), 16.5% (n=204) with antenatal depression (EPDS > 18). Follow-up: 92% at 2 weeks, 88% at 6 months postpartum. | CHWs were local mothers selected for good social and communication skills and trained as *generalist health workers* under the Philani Program. They received 10 days of intensive pre-service training covering maternal and child health, nutrition, HIV prevention, alcohol use, problem-solving, and behavior change techniques based on cognitive–behavioral principles. Training also emphasized empathetic communication, home visit protocols, and goal setting to empower mothers without directly addressing depression | Weekly supervision via in-person and mobile phone meetings; CHWs were randomly observed twice a month by supervisors from the Philani NGO. No payment data provided. | Mobile phones used for data collection and monitoring; CHWs employed home visit records and maternal “Road to Health” cards for tracking infant growth. | For CHWs: The *Philani Intervention Program (PIP)* trained CHWs for 10 days on maternal–child health, nutrition, HIV, alcohol use, and behavior change using cognitive–behavioral methods, followed by weekly supervision.  For Participant (mothers): CHWs conducted about 11 home visits per mother from pregnancy to 6 months postpartum, focusing on caregiving, nutrition, and healthy behaviors to improve infant growth without directly addressing maternal depression | The CHW-led home visiting program (Philani Intervention) improved community-level child health outcomes among antenatally depressed mothers. Infants of depressed mothers in the intervention group showed significantly higher height-for-age scores (ΔHAZ = 0.699; 95% CI: 0.051–1.346; p = 0.034) and reduced stunting compared with controls, despite no reduction in maternal depression. The holistic, community-embedded CHW approach—integrating nutrition, HIV prevention, and caregiving support—demonstrated that non-specialist health workers can effectively enhance maternal caregiving practices and early child growth | Enablers: Institutional support from the Philani NGO, structured 10-day CHW training, weekly supervision with field monitoring, integration with maternal and child health services, and strong community trust. Barriers: Limited scalability in low-resource areas and absence of specific components addressing maternal mental health |
| 27 | (Wightman et al., 2022)  United States of America | Retrospective quasi-experimental study using 11 years of data (2006–2016) from the Arizona Health Start Program, implemented in 14 counties statewide. The study aimed to assess whether CHW-led home visiting improved childhood vaccination completion among underserved families. | 7,218 children of mothers enrolled in the program during pregnancy or postpartum compared with 54,175 matched controls from over 1 million births using propensity score matching | CHWs were predominantly female, bilingual (English/Spanish or Native languages), and members of local communities. They received initial core training and biannual updates from the Arizona Partnership for Immunizations covering vaccine schedules, ASIIS registry use, and client communication. | Supervised by local Health Start coordinators and Arizona Department of Health staff; CHWs participated in monthly case reviews and ongoing performance monitoring. Compensation provided through state-funded employment. | CHWs used the Arizona State Immunization Information System (ASIIS) to track vaccine records and update data; used printed CDC-based materials and vaccination cards during home visits to educate and monitor families | For CHWs: Received standardized and biannual training from the Arizona Partnership for Immunizations on vaccine education, ASIIS use, and communication; participated in ongoing supervision and data audits.  For participants: CHWs conducted home visits (up to four/month) providing maternal–child health education, vaccine reminders, appointment support, and linkage to services. Focused on improving timely completion of childhood immunizations | Children in the Health Start Program had higher full vaccination completion by age five (63.8% vs 58.6%; +5.2 percentage points, p < 0.001) and greater likelihood of on-time vaccination (aHR = 1.13; 95% CI: 1.08–1.19) compared with matched controls. Improvements were most notable among Hispanic/Latinx (+5.5%), rural border (+6.1%), and low-education mothers (+5.1%), indicating increased vaccination coverage among underserved populations | Enablers: Program integration within the state health system, CHW training, supervision, and ASIIS access supported implementation. Barriers: Variable CHW caseloads, incomplete registry data, voluntary enrollment, and observational design limits. |
| 28 | (Masunaga et al., 2022)  The Gambia | Sequential exploratory mixed-method study (QUAL→quan) nested in a malaria elimination trial (RHOST) in 34 rural villages, North Bank Region, The Gambia (2016–2018). | 10 male VHWs and 230 community respondents from 17 intervention villages participated in interviews, FGDs, and surveys.. | All VHWs were male farmers/herders with limited formal education, selected by community consensus. Received additional training on malaria diagnosis, treatment, and communication within the RHOST trial. | VHWs were supervised by field coordinators and study health staff through regular phone calls and on-site visits. They received a small monthly allowance of 1,500 Gambian Dalasi as compensation for their work in diagnosis, treatment, and community mobilization within the RHOST trial | Provided malaria RDT kits, antimalarial drugs, and reporting forms. No digital tools were used; monitoring was via phone calls and in-person supervision. | For CHWs: Received training and small monthly incentive (1500 Dalasi) to diagnose and treat malaria, distribute drugs, and mobilize communities.  For community: Participated in the Reactive Household-based Self-administered Treatment (RHOST) trial through VHW-led drug distribution and communication | Increased proportion of respondents reporting VHWs had RDTs (21→58%) and antimalarials (26→60%). Visits to VHWs when ill rose from 40→64%. VHWs gained symbolic capital and trust as “health diplomats,” improving participation and access to care. | Enablers: Strong community trust, participatory design (CLIH), and VHWs’ social/political status enhanced performance.  Barriers: Contradictory expectations, limited supplies, increased workload, and unequal ben |
| 29 | (Goudge et al., 2023)  South Africa | Longitudinal before–after–6 months post design conducted in two vulnerable communities in Sedibeng District, South Africa (2016–2019). The study aimed to assess whether mentoring by a roving professional nurse improved household coverage and quality of care provided by CHW teams | Two CHW teams (Team 1 = 14 CHWs; Team 2 = 20 CHWs) and their supervisors; household surveys covered ~ 200–600 households per round | CHWs were mostly local women (aged 23–58 yrs, 3–17 yrs experience). Few had completed schooling; only 2–3 passed Level 1 training, none passed Levels 2–3 | Junior enrolled nurses acted as supervisors; during intervention they were mentored by a professional nurse. CHWs were government employed; compensation details not reported | CHWs used BP machines, glucometers, and printed forms for household data and referral letters; no digital or mobile tools reported | For CHWs/supervisors: Mentoring by a roving professional nurse for 15 months to improve clinical, communication, and supervision skills. For households: Routine promotive/preventive visits, screening, and referrals continued under mentored supervision | Household coverage increased ≈ 50% (from ~ 20% to > 30–40%); adjusted OR 2.65 (p < 0.001). CHWs conducted more complex tasks (new household registration, ANC/PNC care, referrals). Quality of care (appropriate messages ≈ 50%) unchanged | Enablers: Supportive mentoring by professional nurse, strengthened CHW-supervisor relationships. Barriers: Supply shortages (e.g., glucose strips), staff motivation issues, strike actions, limited resources |
| 30 | (Horwood et al., 2017)  South Africa | Cluster randomised controlled trial in Ugu District, KwaZulu-Natal, South Africa. The study aimed to assess whether a continuous quality improvement (CQI) mentoring intervention improved the effectiveness of CHWs in delivering maternal and child health services. | 30 CHW supervisors randomly allocated (15 intervention, 15 control); 120 CHWs (4 per supervisor). Household surveys conducted with 736 mothers at baseline and 606 mothers at follow-up. | All CHWs had prior 10-day Department of Health training. Intervention CHWs received an additional 2-week WHO-adapted Community Case Management (CCM) training on ANC, postnatal care, HIV/PMTCT, and newborn care | CHWs formed quality improvement teams with their supervisors. They received bi-monthly mentoring for 12 months and attended quarterly learning sessions. CHWs were employed by the Department of Health; no financial incentives reported | Paper forms and ANC cards used to collect household data; follow-up survey used tablets. No digital applications were introduced for intervention | For CHWs: 2-week CCM training and 12-month CQI mentoring with data review and peer learning sessions. For mothers: routine home visits by trained CHWs focusing on ANC, postnatal care, breastfeeding, and danger sign recognition. | CHW visits during pregnancy increased from 29.0% to 75.7% (*p*<0.0001); postnatal visits 30.3%→72.6% (*p*<0.0001). Maternal knowledge scores improved (49% vs 43%, *p*=0.02); exclusive breastfeeding at 6 weeks higher (76.7% vs 65.1%, *p*=0.02). HIV-positive mothers disclosed status more often (78.7% vs 50.0%, *p*=0.007). Facility-based uptake unchanged | Enablers: Structured CQI mentoring, frequent data feedback, and team learning improved performance. Barriers: Resource demands, travel needs, and limited scalability for large CHW networks. |
| 31 | (Charle-Cuéllar et al., 2022)  Mali | Quasi-experimental before–after study conducted in three districts of Kayes Region (Kayes, Kita, Bafoulabé) from Oct 2017 to Oct 2018. Aim: to analyze the impact of including CHWs as SAM treatment providers outside health facilities on coverage when scaling up intervention in rural Mali. | Under-five children in three districts (109,927 in Kita; 130,423 in Kayes; 31,494 in Bafoulabé) with SAM coverage assessed using SQUEAC before and after intervention. | 152 CHWs (75 in Kita, 43 in Kayes, 34 in Bafoulabé), trained in iCCM and SAM management per national guidelines. Most served villages >5 km from health facilities. | Three levels of supervision: high (Kita = nutrition-specific monthly supervision by Action Against Hunger plus MoH), moderate (Kayes = monthly MoH with NGO support), and standard (Bafoulabé = MoH only). Compensation not reported. | None digital; CHWs used MUAC tapes, RDT kits, and paper forms for screening and treatment records. | For CHWs: Integrated SAM treatment into iCCM activities with different supervision models. For community: Expanded access to SAM screening and treatment through decentralized CHW sites. | SAM treatment coverage increased in Kayes (28.7 → 57.1%) and Bafoulabé (20.4 → 61.1%) but not in Kita (28.4 → 28.5%). Overlap of CHWs and health facilities was associated with lower coverage (≈ 49%), while districts with broader geographical distribution had higher gains. | Enablers: CHW integration into SAM services and supportive supervision. Barriers: Geographical overlap of providers, areas without access to CHWs (>70%), limited community screening in some districts, and unequal service distribution. |

**Abbreviations**: AAD, Adjusted Absolute Difference; AC, Accountable Care; ACT, Artemisinin-Based Combination Therapy / Asthma Control Test; ANC, Antenatal Care; aHR, Adjusted Hazard Ratio; aOR, Adjusted Odds Ratio; aRR, Adjusted Risk Ratio; ART, Antiretroviral Therapy; ARV, Antiretroviral; ASHA, Accredited Social Health Activist; ASIIS, Arizona State Immunization Information System; AUDIT, Alcohol Use Disorders Identification Test; BMI, Body Mass Index; BP, Blood Pressure; BxHSP, Bronx Healthy Start Partnership; CBHP, Community-Based HIV Programme; CBST, Cognitive-Behavioral Skills Training; CD4, Cluster of Differentiation 4; CEHO, Community and Environmental Health Officer; CES-D, Center for Epidemiologic Studies Depression Scale; CFIR, Consolidated Framework for Implementation Research; CHBP, Community-Based Hypertension Program; CHW, Community Health Worker; CI, Confidence Interval; CKD, Chronic Kidney Disease; CLIH, Community-Led Implementation at Household level; coef, Coefficient; COVID-19, Coronavirus Disease 2019; CPD, Cigarettes Per Day; CPR/AED, Cardiopulmonary Resuscitation / Automated External Defibrillator; CQI, Continuous Quality Improvement; CST, Coping Skills Training; CVD/DM, Cardiovascular Disease / Diabetes Mellitus; DMPA, Depot Medroxyprogesterone Acetate; DRC, Democratic Republic of Congo; DTaP, Diphtheria, Tetanus, and Pertussis Vaccine; ED, Emergency Department; EMI, Ecological Momentary Intervention; EPDS, Edinburgh Postnatal Depression Scale; FA, Functional Analysis; FAMSS, Family Asthma Management System Scale; FEV-1, Forced Expiratory Volume in 1 second; FGD, Focus Group Discussion; FP, Family Planning; FQHC, Federally Qualified Health Center; GPS, Global Positioning System; HAZ, Height-for-Age Z-score; HbA1c, Glycosylated Hemoglobin; HIV, Human Immunodeficiency Virus; HIV/PMTCT, Human Immunodeficiency Virus / Prevention of Mother-to-Child Transmission; HRA, Health Risk Assessment; HRSA, Health Resources and Services Administration; HSP, Health Start Program; HTN, Hypertension; iCCM, Integrated Community Case Management; IDI, In-Depth Interview; IMCI, Integrated Management of Childhood Illness; IMPaCT, Individualized Management for Patient-Centered Targets; IQR, Interquartile Range; LBW, Low Birth Weight; LDL-C, Low-Density Lipoprotein Cholesterol; LMIC, Low-and-Middle Income Country; m-RDT, Mobile Rapid Diagnostic Test; MATCH, Managing Asthma Through Case Management in Homes; MCHC, Maternal and Child Health Coordinator; MDH, Management and Development for Health; mHealth, Mobile Health; MfM, Mobile for Mothers; MI, Motivational Interviewing; Mini-PAQLQ, Mini Pediatric Asthma Quality of Life Questionnaire; mmHg, Millimeters of Mercury; MMR, Measles, Mumps, Rubella Vaccine; MoH, Ministry of Health; MoPH, Ministry of Public Health; MPH, Ministry of Public Health; MST-HC, Multisystemic Therapy-Health Care; MUAC, Mid-Upper Arm Circumference; MZN, Mozambican Metical; NCD, Non-Communicable Disease; NDoH, National Department of Health; NGM, Nurse Group Mentor; NGO, Non-Governmental Organization; NHRM, National Rural Health Mission; NPO, Non-Profit Organization; NS, Not Significant; OPM, Operational Manager; OR, Odds Ratio; ORS, Oral Rehydration Salts; PACQLQ, Pediatric Asthma Caregiver Quality of Life Questionnaire; PCV13, Pneumococcal Conjugate Vaccine (13-valent); PHC, Primary Healthcare; PMTCT, Prevention of Mother-to-Child Transmission; PST, Problem-Solving Therapy; QoC, Quality of Care; R, South African Rand; RAcE, Rapid Access Expansion; RCom, Relais Communautaire; RCT, Randomized Controlled Trial; RD, Risk Difference; RDT, Rapid Diagnostic Test; REDCap, Research Electronic Data Capture; RFC, Reach for Control; RHOST, Reactive Household-based Self-administered Treatment; RQI, Rapid Quality Improvement; RR, Risk Ratio; SAM, Severe Acute Malnutrition; SBP, Systolic Blood Pressure; SC, Standard Care; SD, Standard Deviation; SES, Socioeconomic Status; SQUEAC, Semi-Quantitative Evaluation of Access and Coverage; STI, Sexually Transmitted Infection; TB, Tuberculosis; TMLE, Targeted Minimum Loss-Based Estimation; TTCIH, Tanzania Training Centre for International Health; TVET, Technical Vocation Education Training; USAID, United States Agency for International Development; USD, United States Dollar; VA, Veterans Affairs; VHW, Village Health Worker; VIA, Visual Inspection with Acetic Acid; WAJA, Wawezashaji wa Afya ya Jamii; WBOT, Ward-Based Outreach Team; WHO, World Health Organization; WIC, Women, Infants, and Children
