# Supplementary material for: Community Health Worker Program Characteristics and Population Health Outcomes: A Scoping Review
Source: Research Square preprint supplement (doi:10.21203/rs.3.rs-8327009/v1), 2026-01-12
Supplement: Supplementary file 3 [file b5438d58d0e424217207eb89.docx]

Search strategy

| **Database** | **Syntax** | **Number of articles** |
| --- | --- | --- |
| Scopus | ( TITLE-ABS-KEY ( "Community Health Worker*" OR "CHW" ) AND TITLE-ABS-KEY ( "Health Status" OR "outcome assessment, health care" ) AND TITLE-ABS-KEY ( "Community Health Nursing" OR "Community Health services" OR "Program evaluation" OR "Primary health care" ) ) | 223 |
| Web of Science | "Community Health Worker*" OR "Health cadre*" OR "Village health worker*" OR "Lay health worker*" OR "CHW*" (Title) AND "Health status" OR "Health outcome*" OR "Outcome assessment" OR "Service outcome*" OR "Program outcome*" (Title) AND "Community Health Nursing" OR "Community Health services" OR "Community-based health" OR "Program evaluation" OR "Primary health care" OR "PHC" (Abstract) | 2667 |
| CINAHL | ("Community Health Worker*" OR “CHW”)  AND  ("Health Status" OR "Outcome assessment, health care")  AND  ("Community Health Nursing" OR "Community Health services" OR "Program evaluation" OR "Primary health care") | 189 |
